# Supplementary material for: Enhanced cycling stability of ring-shaped phosphorus inside multi-walled carbon nanotubes as anodes for lithium-ion batteries
Source: Royal Society of Chemistry journal article supplement (doi:10.1039/c7ta07683e), 2017-11-27
Supplement: c7ta07683e1.pdf [file c7ta07683e1.pdf]

## Electronic Supplementary Information

# Enhanced cycling stability of ring-shaped phosphorus inside multi-walled carbon nanotubes as anodes for lithium-ion batteries

Dan Zhao,<sup>†,‡</sup> Jinying Zhang,<sup>\*,†</sup> Chengcheng Fu,<sup>†</sup> Jialiang Huang,<sup>†</sup> Dingbin Xiao,<sup>†</sup> Matthew M. F. Yuen,<sup>‡</sup> and Chunming Niu<sup>†</sup>

<sup>†</sup>Center of Nanomaterials for Renewable Energy, State Key Laboratory of Electrical Insulation and Power Equipment, School of Electrical Engineering, Xi'an Jiaotong University, China.

<sup>‡</sup>Department of Mechanical and Aerospace Engineering, Hong Kong University of Science & Technology, Clear Water Bay, Kowloon, Hong Kong.

\*E-mail: [jinying.zhang@mail.xjtu.edu.cn](mailto:jinying.zhang@mail.xjtu.edu.cn) (J. Zhang)

**Table S1** SEM-EDS measurements of *r*-P@MWCNTs, RP-on-*r*-P@MWCNTs, and RP-on-MWCNTs

|                           | Element | Weight % | Atomic % | Error % |
|---------------------------|---------|----------|----------|---------|
| <i>r</i> -P@MWCNTs        | C K     | ~ 85     | ~ 93     | 9.2     |
|                           | P K     | ~ 15     | ~ 7      | 2.0     |
| RP-on- <i>r</i> -P@MWCNTs | C K     | ~ 32     | ~ 55     | 15.8    |
|                           | P K     | ~ 68     | ~ 45     | 1.3     |
| RP-on-MWCNTs              | C K     | ~ 30     | ~ 52     | 17.1    |
|                           | P K     | ~ 70     | ~ 48     | 1.3     |

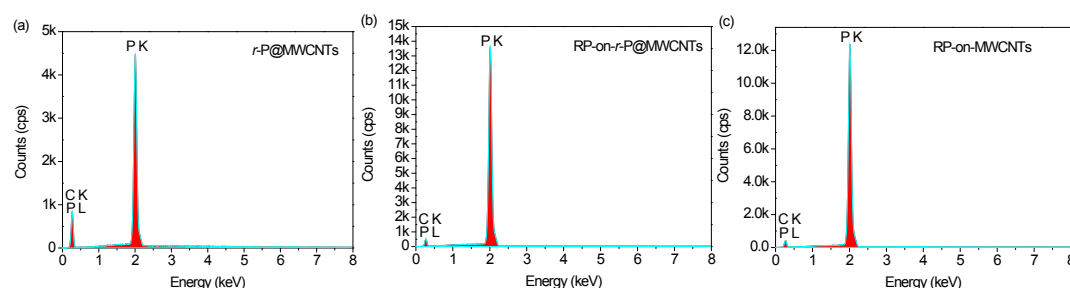

**Figure S1.** EDS spectra of (a) *r*-P@MWCNTs, (b) RP-on-*r*-P@MWCNTs, and (c) RP-on-MWCNTs.

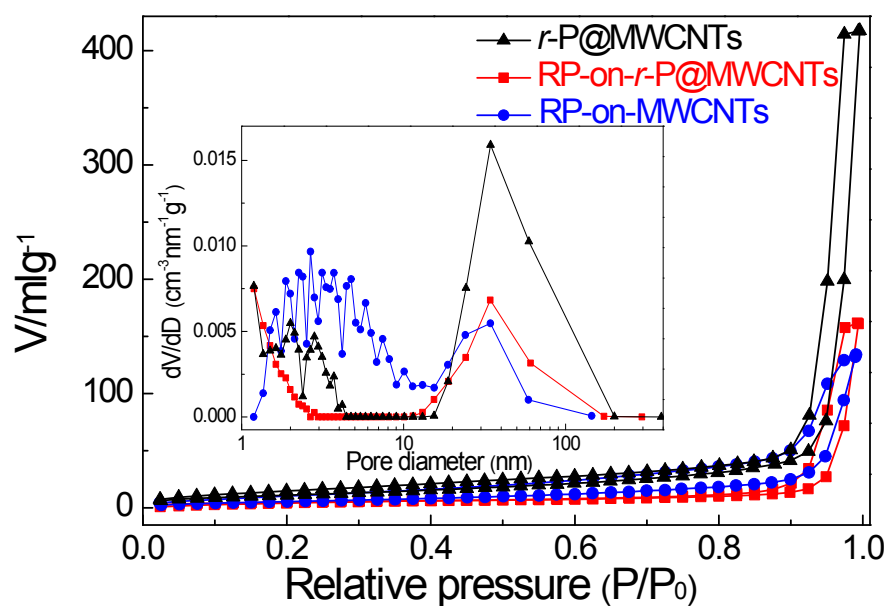

**Figure S2.** Nitrogen adsorption and desorption isotherms for RP-on-r-P@MWCNTs (red), r-P@MWCNTs (black), and RP-on-MWCNTs (blue). The corresponding BJH distributions are shown in the inset.

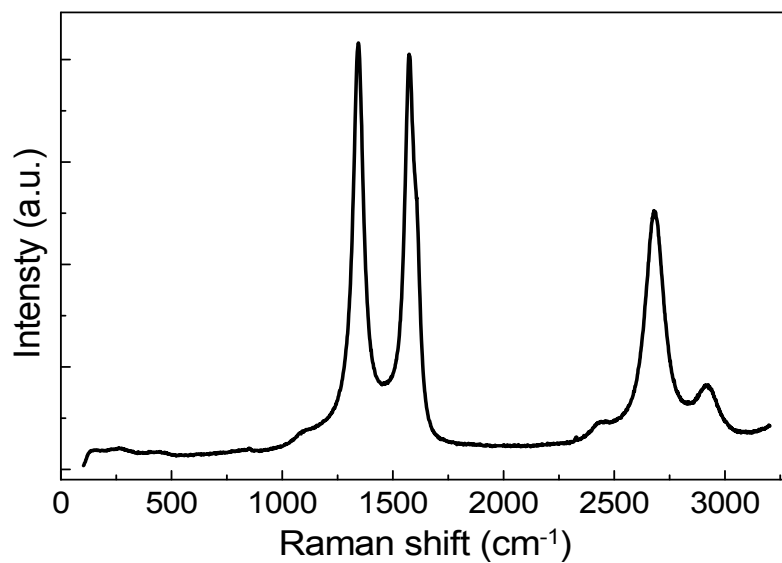

**Figure S3.** Raman spectrum of MWCNTs by 514 nm excitation.
